# Supplementary material for: Adjusting SiO2 : C mole ratios in rice hull ash (RHA) to control carbothermal reduction to nanostructured SiC, Si3N4 or Si2N2O composites
Source: Royal Society of Chemistry journal article supplement (doi:10.1039/d1gc02084f), 2021-01-01
Supplement: d1gc02084f1.pdf [file d1gc02084f1.pdf]

## Supporting Information

# Adjusting SiO<sub>2</sub>:C mole ratios in rice hull ash (RHA) to control carbothermal reduction to nanostructured SiC, Si<sub>3</sub>N<sub>4</sub> or Si<sub>2</sub>N<sub>2</sub>O composites

Mengjie Yu<sup>1</sup>, Eleni Temeche<sup>2</sup>, Sylvio Indris<sup>3</sup>, and Richard M. Laine\*<sup>1,2</sup>

<sup>1</sup>Macromolecular Science and Engineering, University of Michigan, Ann Arbor, MI 48109, USA

<sup>2</sup>Department of Materials Science and Engineering, University of Michigan, Ann Arbor, MI 48109, USA

<sup>3</sup>Institute for Applied Materials-Energy Storage Systems (IAM-ESS), Karlsruhe Institute of Technology (KIT) Eggenstein-Leopoldshafen 76344, Germany

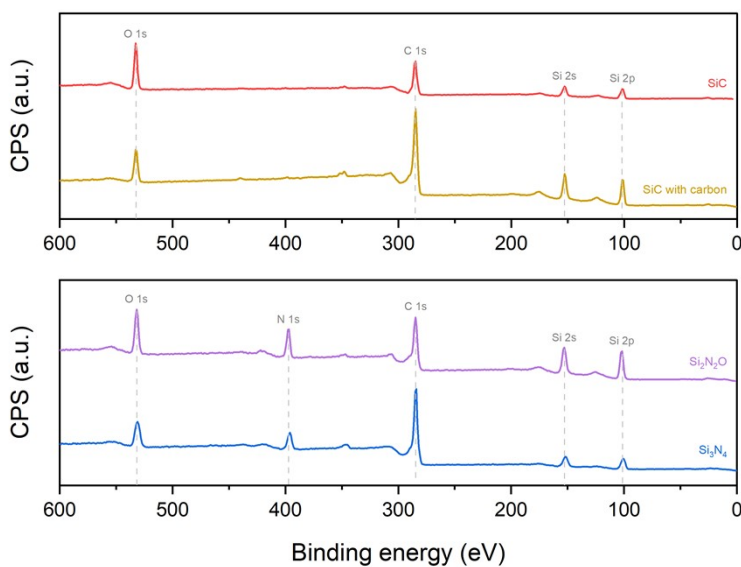

**Figure S1.** XPS wide survey of composites with SiC, Si<sub>3</sub>N<sub>4</sub>, and Si<sub>2</sub>N<sub>2</sub>O as the major phase.

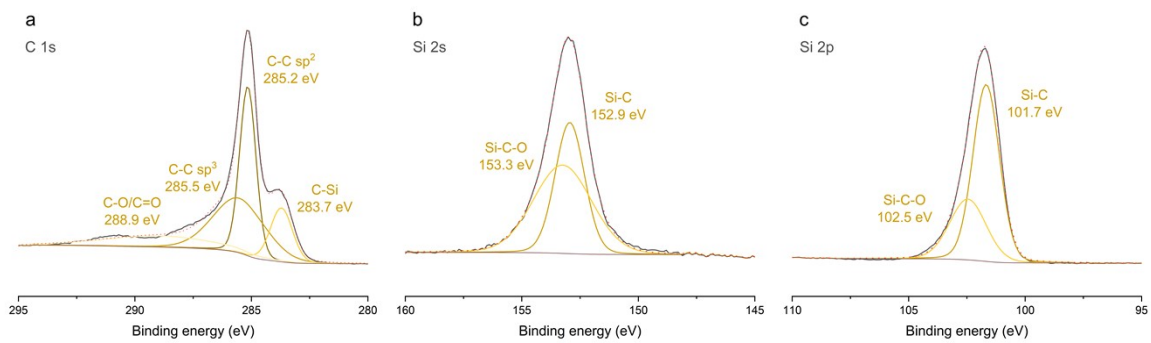

**Figure S2.** XPS **a.** C 1s, **b.** Si 2s, and **c.** Si 2p core-level spectra of SiC composites with 13 wt. % carbon.
